# Supplementary material for: Real-time tunable hydrogen generation from hydrolysis of borohydrides using 3D magnetic catalysts
Source: Royal Society of Chemistry journal article supplement (doi:10.1039/d2qi02411j), 2023-01-01
Supplement: d2qi02411j1.pdf [file d2qi02411j1.pdf]

## Supporting Information

### Real-time tunable hydrogen generation from hydrolysis of borohydride using 3D magnetic catalyst

Junchao Han <sup>a</sup>, Wuning Yuan <sup>b</sup>, Menghui Wei <sup>a</sup>, Bo Zhang <sup>b</sup> and Yanhui Guo <sup>a,\*</sup>

<sup>a</sup>Department of Materials Science, Fudan University, Shanghai 200433, China

<sup>b</sup>Department of Macromolecular Science, Fudan University, Shanghai 200433, China

Correspondence to: [gyh@fudan.edu.cn](mailto:gyh@fudan.edu.cn)

#### Materials

Cobalt sulfate heptahydrate (CoSO<sub>4</sub>·7H<sub>2</sub>O), Nickel sulfate hexahydrate (NiSO<sub>4</sub>·6H<sub>2</sub>O), Sodium molybdate dihydrate (Na<sub>2</sub>MoO<sub>4</sub>·2H<sub>2</sub>O), Sodium sulfate anhydrous (Na<sub>2</sub>SO<sub>4</sub>), Sodium succinate (C<sub>4</sub>H<sub>4</sub>Na<sub>2</sub>O<sub>4</sub>), Sodium Hydroxide (NaOH), ethanol (C<sub>2</sub>H<sub>5</sub>OH), Sodium borohydride (NaBH<sub>4</sub>), Borane dimethylamine complex (DMAB) are all analytical grade and used without further purification. Pure Me<sub>4</sub>NB<sub>3</sub>H<sub>8</sub> was prepared according to published method. Melamine foam (MF) and Polyurethane foam (PU) were purchased from commercial company.

#### Calculations

The effect of temperature on the reaction rate of the synthesized catalysts was analyzed by using the Arrhenius equation as follows:

$$\ln k = \ln A - E_a/RT$$

Where k (mL min<sup>-1</sup> g<sup>-1</sup>) is the rate coefficient, A (mL min<sup>-1</sup> g<sup>-1</sup>) is a constant, E<sub>a</sub> (kJ

$\text{mol}^{-1}$ ) is the activation energy,  $R$  ( $8.314 \text{ J mol}^{-1} \text{ K}^{-1}$ ) is the universal gas constant, and  $T$  (K) is the temperature.

**Table S1.** ICP-AES result of Co-Mo-O-B/MF catalyst

| ICP-AES result |       |
|----------------|-------|
| Co (wt. %)     | 70.21 |
| Mo (wt. %)     | 2.1   |
| B (wt. %)      | 0.5   |
| Co/Mo (atom)   | 54.66 |
| Co/B (atom)    | 25.56 |

**Table S2.** SEM-EDS elemental analysis results of Co-Mo-O-B/MF catalyst

| E1    | AN | Series   | unn.C<br>wt. % | norm.C<br>wt. % | Atom.C<br>at. % | Error<br>% |
|-------|----|----------|----------------|-----------------|-----------------|------------|
| Co    | 27 | L-series | 82.49          | 82.5            | 65.42           | 26.9       |
| O     | 8  | K-series | 11.33          | 11.33           | 30.13           | 4.5        |
| B     | 5  | K-series | 0.59           | 0.59            | 2.55            | 1.1        |
| Mo    | 42 | L-series | 2.31           | 2.3             | 1.12            | 0.1        |
| Au    | 79 | M-series | 3.28           | 3.28            | 0.78            | 0.7        |
| Total |    |          | 100            | 100             | 100             |            |

**Table S3.** EXAFS fitting parameters at the Co K-edge for various samples ( $S_0^2=0.8$  for Co).

| Sample    | Shell | $CN^a$    | $R(\text{\AA})^b$ | $\sigma^2(\text{\AA}^2)^c$ | $\Delta E_0(\text{eV})^d$ |
|-----------|-------|-----------|-------------------|----------------------------|---------------------------|
| Co-Mo-O-B | Co-Co | 2.39±0.82 | 2.44±0.03         | 0.0086±0.0039              | 2.187±3.8                 |
|           | Co-Mo | 0.29±0.49 | 2.67±0.15         | 0.0086±0.0039              | 2.187±3.8                 |

<sup>a</sup> $CN$ , coordination number; <sup>b</sup> $R$ , distance between absorber and backscatter atoms; <sup>c</sup> $\sigma^2$ , Debye-Waller factor to account for both thermal and structural disorders; <sup>d</sup> $\Delta E_0$ , inner potential correction.  $S_0^2$  was fixed to 0.8 for Co, according to the experimental EXAFS fit of Co foil by fixing CN as the known crystallographic value.

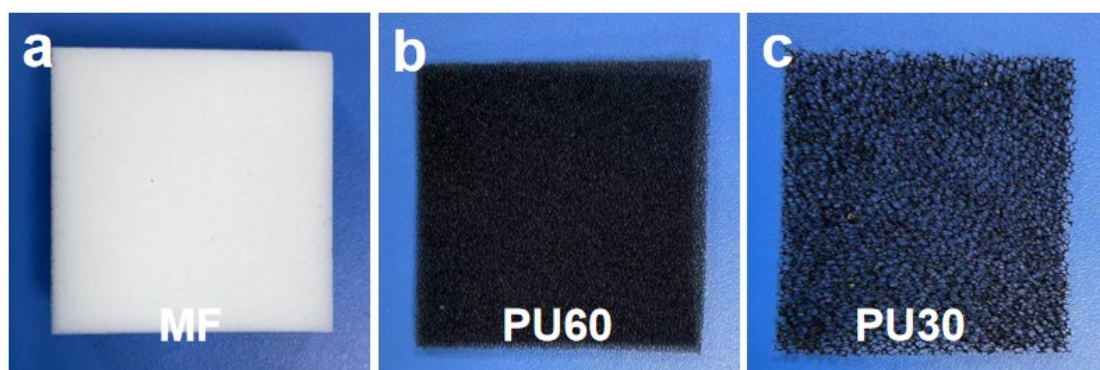

**Fig. S1.** Optical photographs of melamine foam (MF) (a) and polyurethane foam (PU) with pore sizes of 60 ppi (b) and 30 ppi (c).

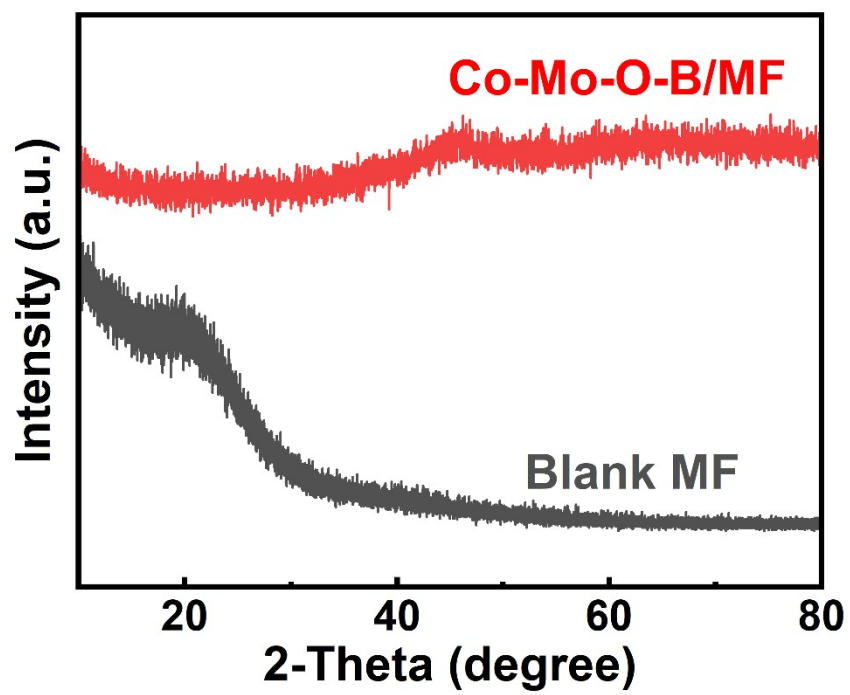

**Fig. S2.** X-ray diffraction patterns of Co-Mo-O-B/MF and Blank MF.

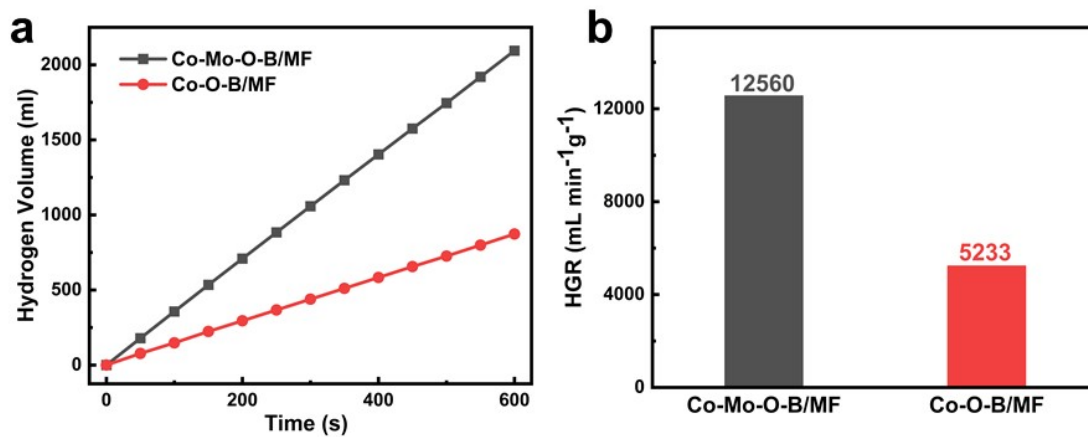

**Fig. S3** (a) Plots of time versus volume of generated H<sub>2</sub> from NaBH<sub>4</sub> alkaline solution catalyzed by Co-Mo-O-B/MF and Co-O-B/MF catalysts and (b) their corresponding HGR (10 wt.% NaBH<sub>4</sub> and 7 wt.% NaOH solution at 30 °C). Co-O-B/MF catalyst without Mo was prepared in the similar way as Co-Mo-O-B/MF except that Na<sub>2</sub>MoO<sub>4</sub> was removed from the corresponding electroless plating bath.



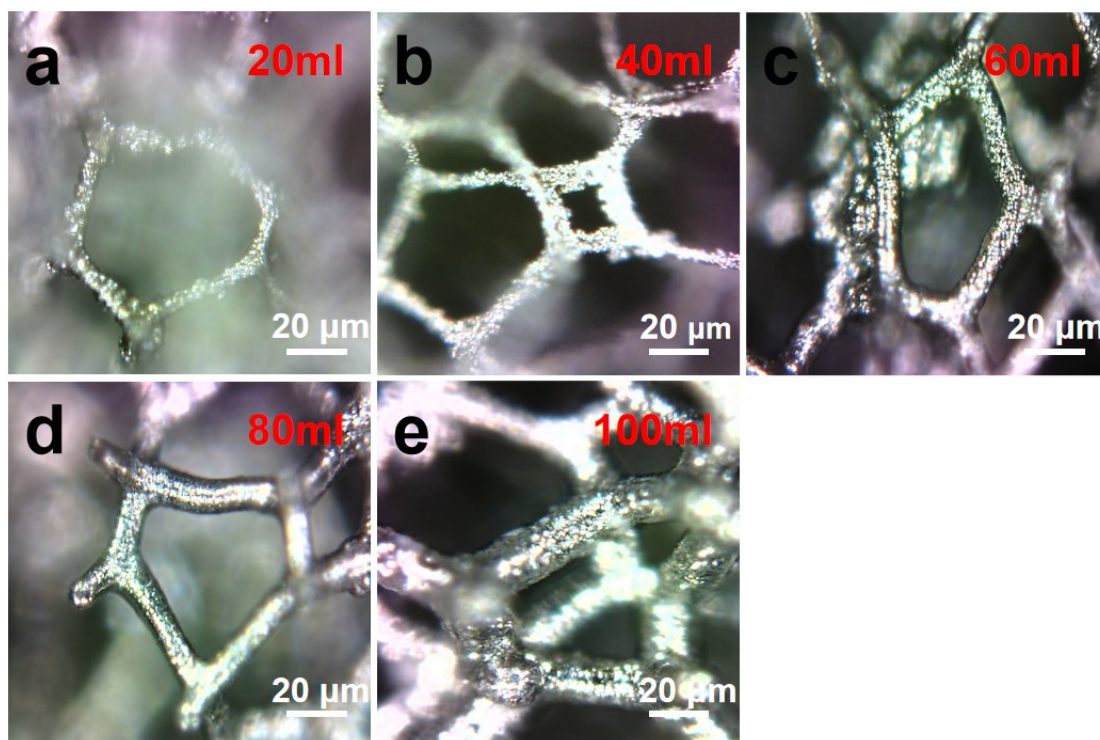

**Fig. S4.** Optical micrographs of Co-Mo-O-B/MF (a), Co-Mo-O-B/MF-40 (b), Co-Mo-O-B/MF-60 (c), Co-Mo-O-B/MF-80 (d), Co-Mo-O-B/MF-100 (e) prepared by increasing the volume of electroless plating bath.

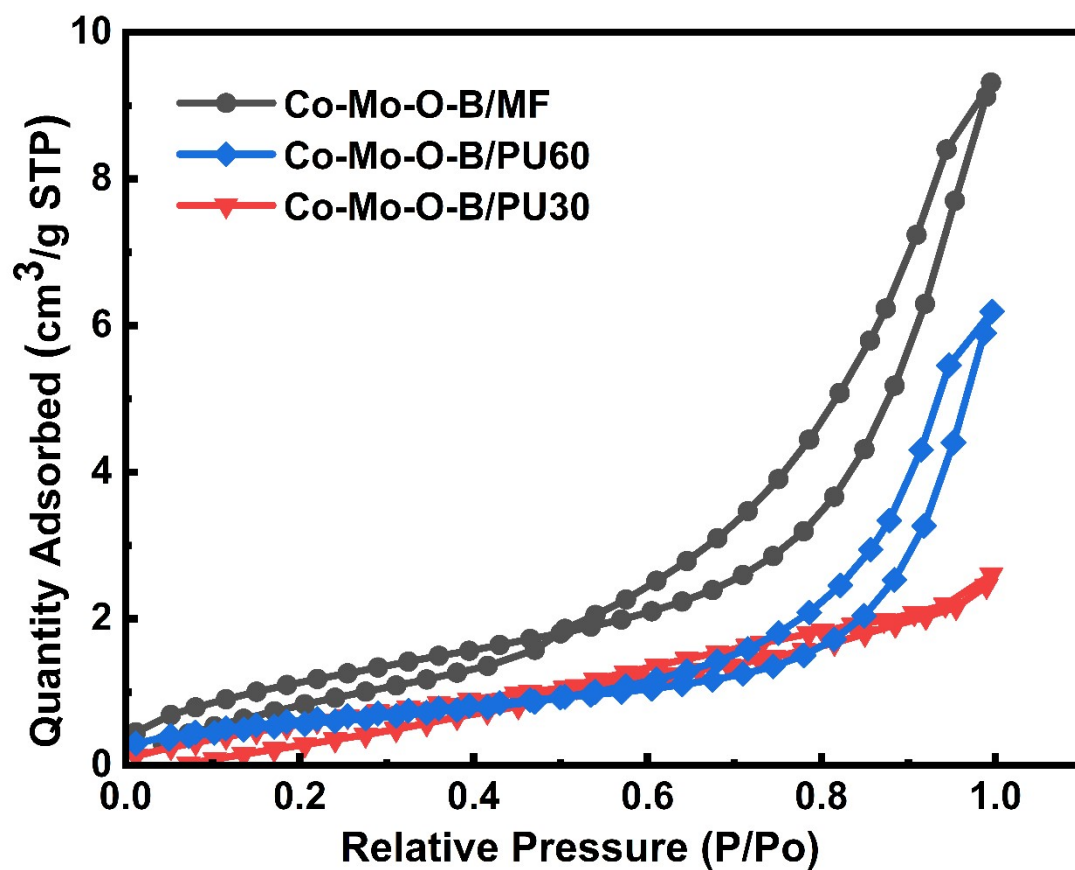

Fig. S5. Isotherm linear plots of Co-Mo-O-B catalysts with different substrates.

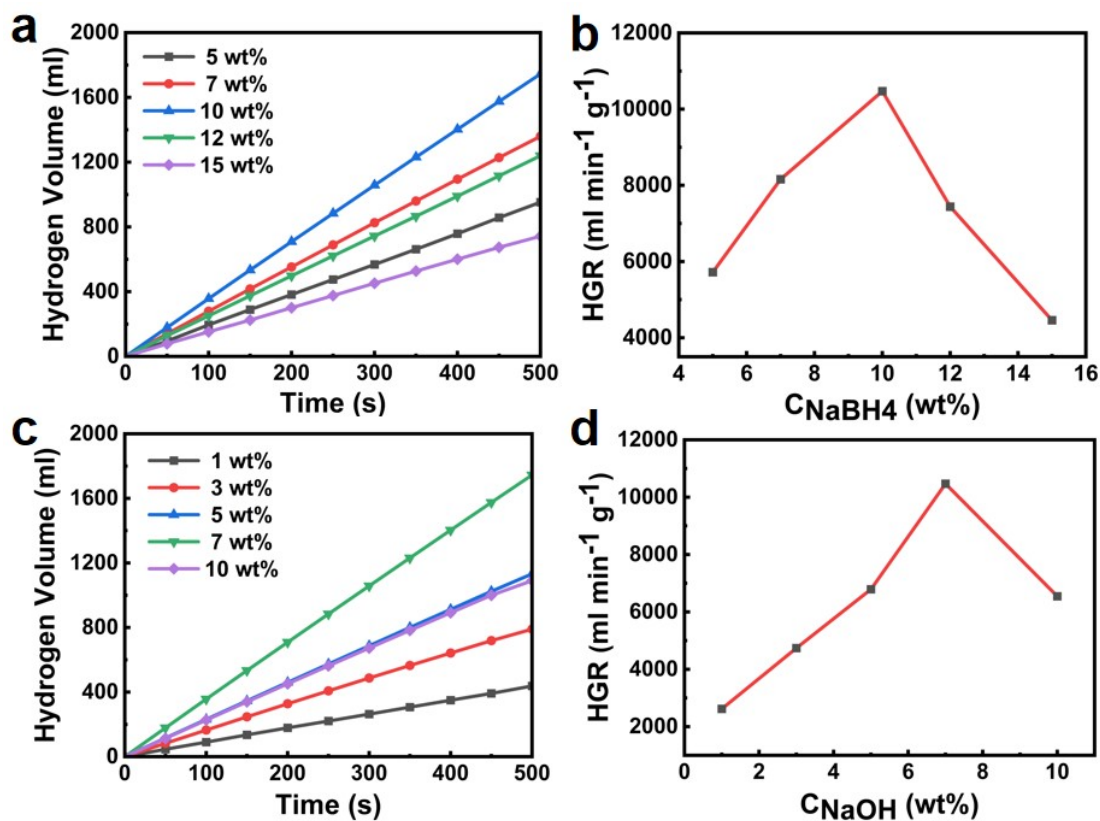

**Fig. S6.** (a) H<sub>2</sub> evolution by Co-Mo-O-B/MF catalysts with different concentrations of NaBH<sub>4</sub> and fixed NaOH concentrations (7 wt.% at 30 °C) and (b) the plot of HGR versus concentration of NaBH<sub>4</sub>. (c) H<sub>2</sub> evolution by Co-Mo-O-B/MF catalysts with different concentrations of NaOH and fixed NaBH<sub>4</sub> concentrations (10 wt.% at 30 °C) and (d) the plot of HGR versus concentration of NaOH.

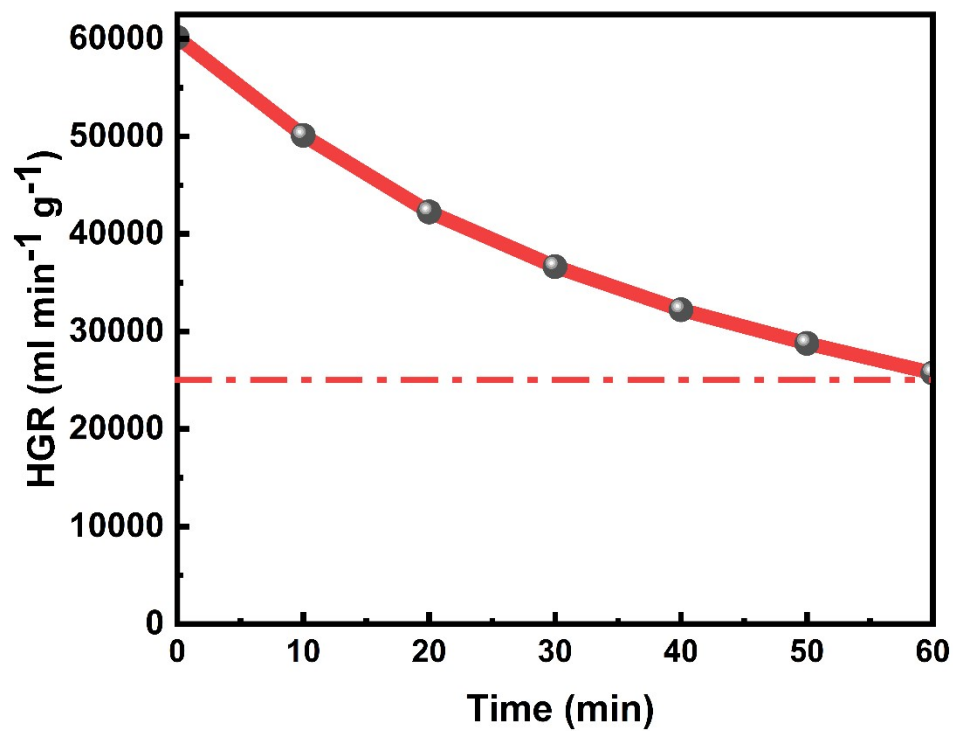

**Fig. S7.** (a) Plot of HGR vs continuous reaction time of the Co-Mo-O-B/MF catalyst (10 wt.% NaBH<sub>4</sub> and 7 wt.% NaOH solution at 60 °C).
